# Supplementary material
Source: PubMed Central journal article supplement (PMC6551000)
Supplement: NIHMS1522129-supplement-1.pdf [file NIHMS1522129-supplement-1.pdf]

**SUPPLEMENTARY TABLE 1.** Multivariable regressions on BBPS total score and adequate bowel cleansing among those prescribed day-before prep dosing (n=2676).

| Variable                              | BBPS total score<br>mean $\pm$ SD | Adjusted<br>p-value * | Adequate bowel<br>cleansing †<br>n (%) | OR [95% CI] *    |
|---------------------------------------|-----------------------------------|-----------------------|----------------------------------------|------------------|
| Prescribed bowel prep:                |                                   |                       |                                        |                  |
| GoLYTELY®                             | 6.56 $\pm$ 1.92                   | reference             | 303 (81.5%)                            | Reference        |
| Moviprep®                             | 7.05 $\pm$ 1.59                   | .007                  | 157 (90.2%)                            | 1.70 [0.92-3.14] |
| Miralax® with Gatorade®               | 7.01 $\pm$ 1.67                   | <.001                 | 1505 (91.2%)                           | 1.99 [1.36-2.92] |
| Prepopik®/Clenpiq®                    | 7.01 $\pm$ 1.55                   | .08                   | 119 (90.2%)                            | 1.60 [0.80-3.18] |
| Suprep®                               | 7.26 $\pm$ 1.68                   | <.001                 | 225 (89.6%)                            | 1.59 [0.93-2.74] |
| Magnesium citrate                     | 6.67 $\pm$ 1.65                   | .84                   | 28 (84.9%)                             | 1.07 [0.38-3.04] |
| Osmoprep®                             | 7.17 $\pm$ 1.72                   | .06                   | 55 (87.3%)                             | 1.25 [0.54-2.90] |
| Bowel prep completion:                |                                   |                       |                                        |                  |
| Did not complete prep                 | 6.82 $\pm$ 1.90                   | reference             | 197 (86.8%)                            | reference        |
| Fully completed prep                  | 6.98 $\pm$ 1.69                   | .42                   | 2171 (89.6%)                           | 1.12 [0.72-1.72] |
| Unknown                               | 7.42 $\pm$ 1.55                   | .15                   | 24 (92.3%)                             | 1.43 [0.31-6.57] |
| Procedure in addition to colonoscopy: |                                   |                       |                                        |                  |
| No                                    | 7.00 $\pm$ 1.68                   | reference             | 1629 (90.2%)                           | reference        |
| Yes                                   | 6.92 $\pm$ 1.76                   | .40                   | 763 (87.8%)                            | 0.85 [0.64-1.12] |
| Fellow involvement:                   |                                   |                       |                                        |                  |
| No                                    | 6.99 $\pm$ 1.72                   | reference             | 2041 (89.4%)                           | reference        |
| Yes                                   | 6.88 $\pm$ 1.64                   | .66                   | 351 (89.3%)                            | 1.10 [0.76-1.59] |
| Withdrawal time:                      |                                   |                       |                                        |                  |
| $\geq$ 6 minutes                      | 7.04 $\pm$ 1.63                   | reference             | 2001 (90.2%)                           | reference        |
| <6 minutes                            | 7.37 $\pm$ 1.81                   | .015                  | 112 (91.8%)                            | 1.35 [0.67-2.73] |
| Unknown                               | 6.41 $\pm$ 2.01                   | <.001                 | 279 (83.0%)                            | 0.55 [0.39-0.76] |

|                                       |             |           |  |                                  |
|---------------------------------------|-------------|-----------|--|----------------------------------|
| Age:                                  |             |           |  |                                  |
| 18-49 y                               | 7.02 ± 1.74 | reference |  | 699 (88.6%)<br>reference         |
| 50-64 y                               | 6.99 ± 1.75 | .80       |  | 898 (88.8%)<br>1.14 [0.81-1.60]  |
| ≥65 y                                 | 6.91 ± 1.61 | .42       |  | 795 (90.8%)<br>1.26 [0.86-1.84]  |
| Gender:                               |             |           |  |                                  |
| Female                                | 7.11 ± 1.68 | reference |  | 1228 (90.6%)<br>reference        |
| Male                                  | 6.84 ± 1.72 | <.001     |  | 1164 (88.2%)<br>0.78 [0.60-1.02] |
| Race/ethnicity:                       |             |           |  |                                  |
| Non-Hispanic white                    | 6.99 ± 1.68 | reference |  | 1679 (89.9%)<br>reference        |
| Non-Hispanic black                    | 6.85 ± 1.88 | .48       |  | 254 (88.2%)<br>0.85 [0.55-1.30]  |
| Latino                                | 6.87 ± 1.78 | .47       |  | 205 (85.4%)<br>0.70 [0.44-1.10]  |
| Asian                                 | 7.12 ± 1.56 | .13       |  | 154 (89.5%)<br>1.12 [0.65-1.92]  |
| Other/unknown                         | 7.08 ± 1.65 | .58       |  | 100 (92.6%)<br>1.50 [0.70-3.22]  |
| Primarily language:                   |             |           |  |                                  |
| English speaker                       | 6.98 ± 1.71 | reference |  | 2182 (89.5%)<br>reference        |
| Non-English speaker                   | 6.95 ± 1.69 | .21       |  | 210 (88.6%)<br>1.24 [0.75-2.07]  |
| Body mass index (kg/m <sup>2</sup> ): |             |           |  |                                  |
| <25                                   | 6.96 ± 1.70 | reference |  | 1106 (89.1%)<br>reference        |
| 25-29.9                               | 7.05 ± 1.67 | .03       |  | 728 (89.5%)<br>1.15 [0.85-1.56]  |
| ≥30                                   | 6.89 ± 1.76 | .52       |  | 530 (89.7%)<br>1.36 [0.96-1.95]  |
| Unknown                               | 7.30 ± 1.74 | .71       |  | 28 (93.3%)<br>1.56 [0.35-6.85]   |
| Opioid use:                           |             |           |  |                                  |
| No                                    | 7.04 ± 1.64 | reference |  | 2048 (90.6%)<br>reference        |
| Yes                                   | 6.64 ± 1.97 | .001      |  | 344 (82.9%)<br>0.57 [0.42-0.78]  |
| Tricyclic antidepressant use:         |             |           |  |                                  |
| No                                    | 6.99 ± 1.69 | reference |  | 2368 (89.7%)<br>reference        |
| Yes                                   | 6.14 ± 2.28 | .004      |  | 24 (68.6%)<br>0.25 [0.11-0.53]   |

|                        |             |           |  |              |                  |
|------------------------|-------------|-----------|--|--------------|------------------|
| Type I or II diabetes: |             |           |  |              |                  |
| No                     | 7.04 ± 1.69 | reference |  | 2027 (90.1%) | reference        |
| Yes                    | 6.65 ± 1.77 | .001      |  | 365 (85.5%)  | 0.67 [0.47-0.95] |
| Liver cirrhosis:       |             |           |  |              |                  |
| No                     | 6.99 ± 1.70 | reference |  | 2351 (89.7%) | reference        |
| Yes                    | 6.27 ± 1.91 | .06       |  | 41 (73.2%)   | 0.43 [0.22-0.84] |

BBPS, Boston Bowel Preparation Scale; CI, confidence interval; OR, odds ratio; SD, standard deviation.

\* The multivariable linear and logistic regression models with random effects included all variables in the table.

† Adequate bowel cleansing was defined as total BBPS score ≥6 with each segment BBPS score ≥2.

**SUPPLEMENTARY TABLE 2.** Multivariable regressions on BBPS total score and adequate bowel cleansing among those prescribed split prep dosing (n=1663).

| Variable                              | BBPS total score<br>mean ± SD | Adjusted<br>p-value * | Adequate bowel<br>cleansing †<br>n (%) | OR [95% CI] *    |
|---------------------------------------|-------------------------------|-----------------------|----------------------------------------|------------------|
| Prescribed bowel prep:                |                               |                       |                                        |                  |
| GoLYTELY®                             | 6.97 ± 1.71                   | reference             | 127 (90.7%)                            | reference        |
| Moviprep®                             | 7.20 ± 1.67                   | .44                   | 110 (92.4%)                            | 0.91 [0.34-2.43] |
| Miralax® with Gatorade®               | 7.21 ± 1.60                   | .25                   | 994 (94.5%)                            | 1.17 [0.56-2.45] |
| Prepopik®/Clenpiq®                    | 7.02 ± 1.65                   | .78                   | 86 (91.5%)                             | 0.67 [0.24-1.92] |
| Suprep®                               | 7.30 ± 1.64                   | .17                   | 201 (91.8%)                            | 0.79 [0.32-1.94] |
| Magnesium citrate                     | 7.25 ± 1.37                   | .34                   | 20 (100%)                              | --- ‡            |
| Osmoprep®                             | 6.58 ± 2.27                   | .22                   | 12 (63.2%)                             | 0.14 [0.04-0.51] |
| Bowel prep completion:                |                               |                       |                                        |                  |
| Did not complete prep                 | 7.03 ± 1.85                   | reference             | 101 (86.3%)                            | reference        |
| Fully completed prep                  | 7.19 ± 1.61                   | .31                   | 1435 (93.7%)                           | 2.24 [1.21-4.16] |
| Unknown                               | 7.43 ± 1.50                   | .29                   | 14 (100%)                              | --- ‡            |
| Procedure in addition to colonoscopy: |                               |                       |                                        |                  |
| No                                    | 7.23 ± 1.59                   | reference             | 1018 (94.0%)                           | reference        |
| Yes                                   | 7.11 ± 1.70                   | .37                   | 532 (91.7%)                            | 0.79 [0.52-1.21] |
| Fellow involvement:                   |                               |                       |                                        |                  |
| No                                    | 7.19 ± 1.62                   | reference             | 1349 (93.6%)                           | reference        |
| Yes                                   | 7.14 ± 1.68                   | .65                   | 201 (91.0%)                            | 0.65 [0.37-1.14] |
| Withdrawal time:                      |                               |                       |                                        |                  |
| ≥6 minutes                            | 7.26 ± 1.58                   | reference             | 1252 (93.5%)                           | reference        |
| <6 minutes                            | 7.26 ± 1.56                   | .83                   | 138 (96.5%)                            | 1.83 [0.68-4.95] |
| Unknown                               | 6.59 ± 1.89                   | <.001                 | 160 (88.4%)                            | 0.53 [0.31-0.90] |

|                                       |             |           |  |                                  |
|---------------------------------------|-------------|-----------|--|----------------------------------|
| Age:                                  |             |           |  |                                  |
| 18-49 y                               | 7.35 ± 1.67 | reference |  | 277 (93.0%)<br>reference         |
| 50-64 y                               | 7.20 ± 1.63 | .16       |  | 702 (93.4%)<br>0.95 [0.53-1.70]  |
| ≥65 y                                 | 7.09 ± 1.60 | .05       |  | 571 (93.2%)<br>0.85 [0.46-1.55]  |
| Gender:                               |             |           |  |                                  |
| Female                                | 7.24 ± 1.64 | reference |  | 806 (93.1%)<br>reference         |
| Male                                  | 7.13 ± 1.62 | .03       |  | 744 (93.4%)<br>0.87 [0.57-1.31]  |
| Race/ethnicity:                       |             |           |  |                                  |
| Non-Hispanic white                    | 7.17 ± 1.62 | reference |  | 1008 (93.0%)<br>reference        |
| Non-Hispanic black                    | 6.89 ± 1.64 | .05       |  | 196 (92.9%)<br>1.03 [0.55-1.92]  |
| Latino                                | 7.29 ± 1.65 | .05       |  | 168 (90.8%)<br>0.79 [0.42-1.48]  |
| Asian                                 | 7.72 ± 1.53 | .002      |  | 105 (99.1%)<br>6.40 [0.87-47.26] |
| Other/unknown                         | 7.25 ± 1.66 | .50       |  | 73 (94.8%)<br>1.31 [0.45-3.81]   |
| Primarily language:                   |             |           |  |                                  |
| English speaker                       | 7.21 ± 1.62 | reference |  | 1441 (93.3%)<br>reference        |
| Non-English speaker                   | 6.88 ± 1.70 | .006      |  | 109 (91.6%)<br>0.70 [0.32-1.51]  |
| Body mass index (kg/m <sup>2</sup> ): |             |           |  |                                  |
| <25                                   | 7.19 ± 1.64 | reference |  | 606 (92.2%)<br>reference         |
| 25-29.9                               | 7.28 ± 1.64 | .11       |  | 474 (95.0%)<br>1.67 [0.99-2.81]  |
| ≥30                                   | 7.07 ± 1.61 | .93       |  | 446 (92.5%)<br>1.05 [0.64-1.73]  |
| Unknown                               | 7.28 ± 1.62 | .78       |  | 24 (96.0%)<br>1.88 [0.24-14.93]  |
| Opioid use:                           |             |           |  |                                  |
| No                                    | 7.26 ± 1.58 | reference |  | 1323 (94.4%)<br>reference        |
| Yes                                   | 6.77 ± 1.81 | <.001     |  | 227 (86.6%)<br>0.37 [0.23-0.58]  |
| Tricyclic antidepressant use:         |             |           |  |                                  |
| No                                    | 7.19 ± 1.63 | reference |  | 1516 (93.3%)<br>reference        |
| Yes                                   | 6.76 ± 1.67 | .28       |  | 34 (89.5%)<br>0.75 [0.24-2.30]   |

|                        |             |           |  |              |                  |
|------------------------|-------------|-----------|--|--------------|------------------|
| Type I or II diabetes: |             |           |  |              |                  |
| No                     | 7.22 ± 1.63 | reference |  | 1295 (93.2%) | reference        |
| Yes                    | 7.02 ± 1.61 | .36       |  | 255 (93.4%)  | 1.11 [0.62-2.00] |
| Liver cirrhosis:       |             |           |  |              |                  |
| No                     | 7.19 ± 1.63 | reference |  | 1535 (93.4%) | reference        |
| Yes                    | 6.37 ± 1.42 | .03       |  | 15 (79.0%)   | 0.26 [0.07-0.90] |

BBPS, Boston Bowel Preparation Scale; CI, confidence interval; OR, odds ratio; SD, standard deviation.

\* The multivariable linear and logistic regression models with random effects included all variables in the table.

† Adequate bowel cleansing was defined as total BBPS score ≥6 with each segment BBPS score ≥2.

‡ Variable level was not included in the logistic regression model as it fully predicted the outcome of adequate bowel cleansing.
